# Supplementary material for: An aqueous miscible organic (AMO) process for layered double hydroxides (LDHs) for the enhanced properties of polypropylene/LDH composites
Source: Royal Society of Chemistry journal article supplement (doi:10.1039/c9nj06444c), 2020-01-01
Supplement: c9nj06444c1.pdf [file c9nj06444c1.pdf]

## Supporting Information

### **Aqueous Miscible Organic (AMO) Process for Layered Double Hydroxides (LDHs) on Enhanced Properties of Polypropylene/LDH Composites**

Qian Zhang, <sup>‡a</sup> Yixuan Guo, <sup>‡a</sup> Fabrice Leroux, <sup>b</sup> Pinggui Tang, <sup>a</sup> Dianqing Li, <sup>a</sup> Liren Wang\*<sup>a</sup>  
and Yongjun Feng\*<sup>a,c</sup>

a. State Key Laboratory of Chemical Resource Engineering, Beijing Engineering Center for Hierarchical Catalysts, Beijing University of Chemical Technology, No. 15 Beisanhuan East Road, Beijing 100029, China.

b. Universite Clermont Auvergne, Institut de Chimie de Clermont-Ferrand ICCF, UMR-CNRS 6296, F 63171 Aubière, France.

c. Anqing Research Institute, Beijing University of Chemical Technology, No. 8 Huanhu West Road, High-Tech district, Anqing city, Anhui, 24600, China.

\*Corresponding author:

Y.J. Feng, E-mail: yjfeng@mail.buct.edu.cn

L.R. Wang, E-mail: wanglr@mail.buct.edu.cn

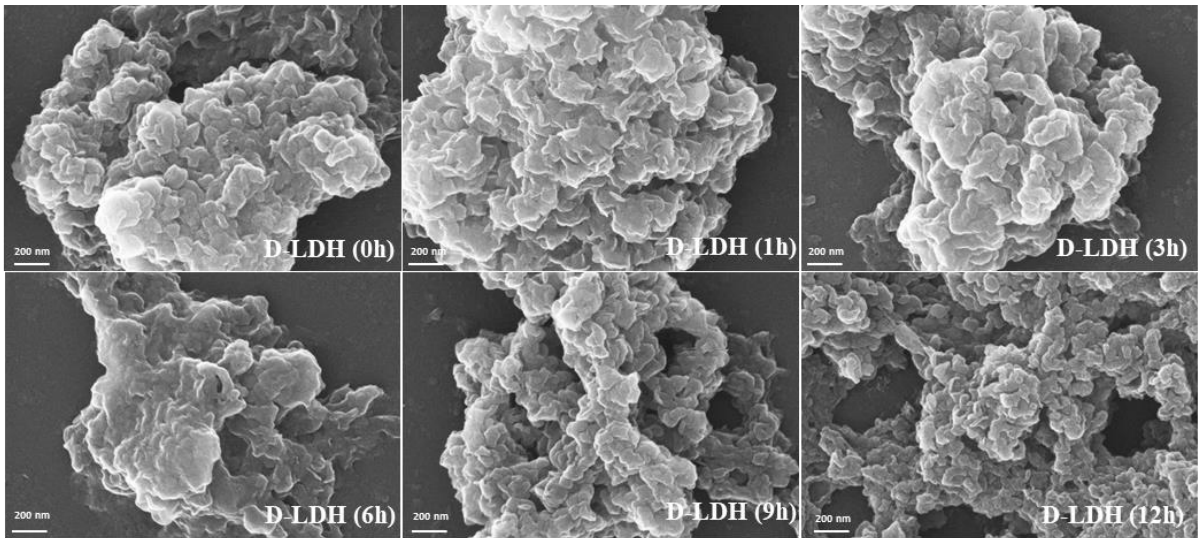

Fig. S1 SEM images of D-LDH (h).
